# Supplementary material
Source: PubMed Central journal article supplement (PMC7192552)

SUPPLEMENTAL FIGURE 1.

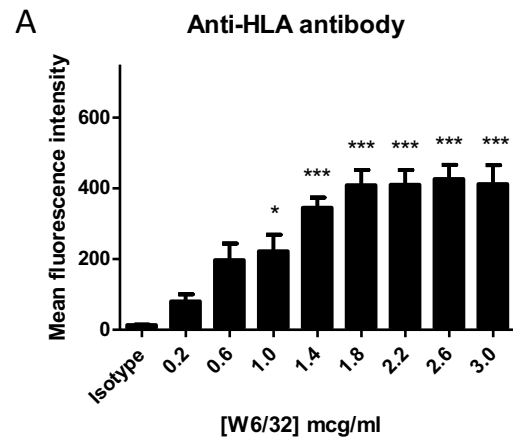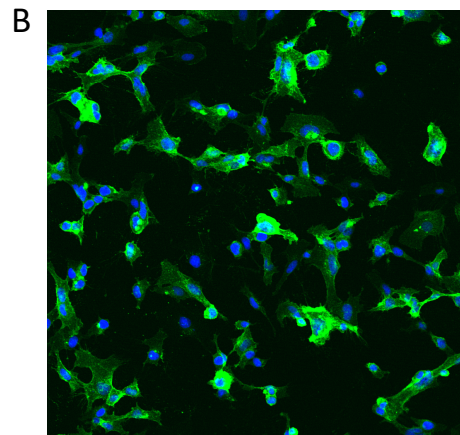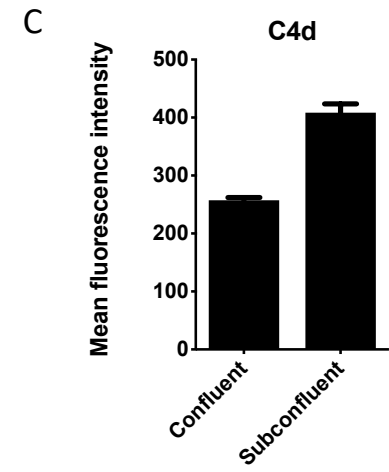

Supplement: NIHMS1575979-supplement-1.pdf [file NIHMS1575979-supplement-1.pdf]
